## EFFECTS OF ENVIRONMENTAL SALINITY ON Na<sup>+</sup>/K<sup>+</sup>-ATPase IN THE GILLS AND RECTAL GLAND OF A EURYHALINE ELASMOBRANCH (*DASYATIS SABINA*)

PETER M. PIERMARINI\* AND DAVID H. EVANS

University of Florida, Department of Zoology, Box 118525, 223 Bartram Hall, Gainesville, FL 32611, USA

\*e-mail: pmpierma@zoo.ufl.edu

Accepted 28 June; published on WWW 7 September 2000

### Summary

Changes in Na<sup>+</sup>/K<sup>+</sup>-ATPase activity and abundance associated with environmental salinity were investigated in the gills and rectal gland of the Atlantic stingray *Dasyatis sabina*. Using a ouabain-specific ATPase assay and western blotting, we found that stingrays from fresh water had the highest activity and highest relative abundance of Na<sup>+</sup>/K<sup>+</sup>-ATPase in the gills. Using immunohistochemistry, we also found that gills from freshwater stingrays had the greatest number of Na<sup>+</sup>/K<sup>+</sup>-ATPase-rich cells. When freshwater stingrays were acclimated to sea water for 1 week, the activity and abundance of Na<sup>+</sup>/K<sup>+</sup>-ATPase and the number of Na<sup>+</sup>/K<sup>+</sup>-ATPase-rich cells decreased in the gills. In seawater stingrays, the branchial activity and abundance of Na<sup>+</sup>/K<sup>+</sup>-ATPase and the number of Na<sup>+</sup>/K<sup>+</sup>-ATPase-rich cells were further reduced. In rectal glands, the activity and

abundance of Na<sup>+</sup>/K<sup>+</sup>-ATPase were lower in freshwater animals than in seawater-acclimated and seawater stingrays, both of which had equivalent levels. These findings suggest that salinity-associated changes in gill and rectal gland Na<sup>+</sup>/K<sup>+</sup>-ATPase activity are due to changes in the abundance of Na<sup>+</sup>/K<sup>+</sup>-ATPase. We conclude that the gills may be important for active ion uptake in fresh water, while the rectal gland is important for active NaCl excretion in sea water. The results from this study are the first to demonstrate an effect of environmental salinity on Na<sup>+</sup>/K<sup>+</sup>-ATPase expression in the gills and rectal gland of an elasmobranch.

Key words: Na<sup>+</sup>/K<sup>+</sup>-ATPase, gill, rectal gland, elasmobranch, stingray, *Dasyatis sabina*, salinity, euryhaline.

### Introduction

The role of the teleost gill epithelium in the acclimation of euryhaline teleost fishes to both freshwater and seawater environments has been studied extensively. Na<sup>+</sup>/K<sup>+</sup>-ATPase is one of the most important enzymes associated with ion regulation in the fish gill because it indirectly energizes the branchial excretion of NaCl from marine teleosts (see McCormick, 1995; Marshall and Bryson, 1998; Evans et al., 1999). The role of Na<sup>+</sup>/K<sup>+</sup>-ATPase in freshwater ion balance is not well understood, but it may be important for establishing electrochemical gradients necessary for NaCl and/or Ca<sup>2+</sup> uptake (see Perry, 1997).

Na<sup>+</sup>/K<sup>+</sup>-ATPase is a membrane-bound P-ATPase composed of at least three subunits:  $\alpha$ ,  $\beta$  and  $\gamma$  (Blanco and Mercer, 1998). This ubiquitous transporter is involved in maintaining routine cell volume and resting membrane potential (Blanco and Mercer, 1998) and is extremely abundant in specialized ion-transporting cells. Two well-studied examples in fishes are the marine teleost chloride cell and the elasmobranch rectal gland tubule cell. In these two cell types, Na<sup>+</sup>/K<sup>+</sup>-ATPase is localized along the complex basolateral membrane and/or tubule system (Karnaky et al., 1976; Eveloff et al., 1979), the large surface areas of which amplify the possible sites for Na<sup>+</sup>/K<sup>+</sup>-ATPase insertion (Karnaky, 1986; Valentich et al., 1995). Many

researchers have reported a positive correlation between environmental salinity and the biochemical activity of branchial Na<sup>+</sup>/K<sup>+</sup>-ATPase in teleost fishes, especially in salmonids and anguillids (Kultz and Jurss, 1993; Madsen et al., 1995; McCormick, 1995; Uchida et al., 1996, 1997; Crockett, 1999; D'Cotta et al., 2000). However, in other species, branchial Na<sup>+</sup>/K<sup>+</sup>-ATPase activity in freshwater-acclimated individuals is equivalent to or exceeds that of seawater-acclimated fish (Yoshikawa et al., 1993; Madsen et al., 1994; McCormick, 1995; Jensen et al., 1998; Vonck et al., 1998; Kelly et al., 1999; Marshall et al., 1999).

Recently, there have been further insights into the cellular regulation of fish gill Na<sup>+</sup>/K<sup>+</sup>-ATPase using heterologous and homologous antibodies and partial cDNA sequences to the  $\alpha$ -subunit. For example, changes in branchial Na<sup>+</sup>/K<sup>+</sup>-ATPase activity have been positively correlated with Na<sup>+</sup>/K<sup>+</sup>-ATPase-specific mRNA and protein levels (Kisen et al., 1994; Cutler et al., 1995; Madsen et al., 1995; Hwang et al., 1998; Jensen et al., 1998; Lee et al., 1998; D'Cotta et al., 2000), suggesting that changes in fish gill Na<sup>+</sup>/K<sup>+</sup>-ATPase activity are due to changes in the relative abundance of the enzyme. In mammals, activation of latent Na<sup>+</sup>/K<sup>+</sup>-ATPase has also been shown to be responsible for changes in the activity of the enzyme (Ewart

and Klip, 1995), but this has not been extensively studied in fish.

Na<sup>+</sup>/K<sup>+</sup>-ATPase-rich cells have been immunolocalized on both gill lamellae and interlamellar regions of freshwater chum salmon (*Oncorhynchus keta*), but the cells are only present on the interlamellar region of seawater-acclimated individuals (Uchida et al., 1996, 1997; Ura et al., 1996; Shikano and Fujio, 1998b). It has been suggested that Na<sup>+</sup>/K<sup>+</sup>-ATPase-rich cells found on the lamellae may be involved with ion uptake from fresh water, whereas interlamellar Na<sup>+</sup>/K<sup>+</sup>-ATPase-rich cells are associated with NaCl excretion in a marine environment (Laurent and Dunel, 1980; Uchida et al., 1996; Seidelin and Madsen, 1999). The guppy (*Poecilia reticulata*) is an exception, because Na<sup>+</sup>/K<sup>+</sup>-ATPase-rich cells are only found in interlamellar regions, regardless of salinity (Shikano and Fujio, 1998a,c, 1999).

In contrast to teleost fishes, the role of the gill epithelium in elasmobranch ion regulation has not been well studied. It is thought that the gills do not play a large role in NaCl excretion since elasmobranchs have a salt-secreting rectal gland (Shuttleworth, 1988; Karnaky, 1998). However, a few studies have suggested that the gills are a potential site of net salt secretion, since plasma NaCl concentrations were maintained well below seawater levels when rectal glands were surgically removed from spiny dogfish *Squalus acanthias* (Burger, 1965; Evans et al., 1982). In addition, recent evidence of natriuretic peptide receptors in the gills of two marine elasmobranch species (Donald et al., 1997; Sakaguchi and Takei, 1998) may indicate that the gills are involved in ion regulation. In freshwater elasmobranchs, the gills are presumably the site of ion uptake, but data are lacking.

Mitochondria-rich and Na<sup>+</sup>/K<sup>+</sup>-ATPase-rich cells have been described from the gills of a few marine elasmobranch species (Laurent and Dunel, 1980; Laurent, 1984; Conley and Mallatt, 1988). In contrast to chloride cells found in teleost gills, elasmobranch Na<sup>+</sup>/K<sup>+</sup>-ATPase-rich cells lack the complex basolateral membrane/tubule system, apical crypt and accessory cells. Branchial Na<sup>+</sup>/K<sup>+</sup>-ATPase activity has been measured in seawater-acclimated *S. acanthias* (Jampol and Epstein, 1970; Morgan et al., 1997) and was found to be considerably lower than that in teleost gills and in the elasmobranch rectal gland. No study has localized or measured branchial Na<sup>+</sup>/K<sup>+</sup>-ATPase activity from an elasmobranch acclimated to a salinity lower than full-strength sea water.

The mechanisms and regulation of NaCl secretion have been relatively well studied in the marine elasmobranch rectal gland, where Na<sup>+</sup>/K<sup>+</sup>-ATPase plays an important role in energizing active NaCl transport (see Riordan et al., 1994; Valentich et al., 1995; Silva et al., 1997). However, the function of the rectal gland in elasmobranchs from low-salinity environments has not been thoroughly investigated. Oguri (1964) and Thorson et al. (1983) have demonstrated a positive correlation between relative rectal gland size and environmental salinity, suggesting a decreased function in fresh water. Only Gerzeli et al. (1976) have looked at biochemical changes associated with the rectal gland in lower salinities, and they demonstrated

that freshwater bull sharks (*Carcharhinus leucas*) had rectal glands with a lower total ATPase activity than their marine counterparts. Although a salt-secreting gland may appear to have no ion-regulatory function in fresh water, the rectal gland is still composed of numerous secretory tubules in both euryhaline and stenohaline freshwater species (Oguri, 1964; Thorson et al., 1978).

The Atlantic stingray (*Dasyatis sabina*) is one of the few elasmobranch species that has established reproducing populations in both freshwater and marine environments. It is, therefore, an excellent model for studying elasmobranch osmoregulatory mechanisms. In a previous study, we demonstrated that freshwater Atlantic stingray populations had a lower concentration of major plasma osmolytes and a smaller rectal gland than marine Atlantic stingrays (Piermarini and Evans, 1998). The freshwater stingrays were capable of acclimating to sea water, where their plasma NaCl and urea concentrations were similar to those of marine stingrays, but the size of their rectal gland did not change appreciably (Piermarini and Evans, 1998).

The goals of this study were to compare the activity, relative amount and localization (gills only) of Na<sup>+</sup>/K<sup>+</sup>-ATPase in the gills and rectal gland of Atlantic stingrays from freshwater and seawater environments. We also compared the same variables in freshwater stingrays acclimated to sea water for 1 week. This study is the first to demonstrate an effect of environmental salinity on the activity and expression of Na<sup>+</sup>/K<sup>+</sup>-ATPase in the gills and rectal gland of an elasmobranch and to demonstrate the distribution of Na<sup>+</sup>/K<sup>+</sup>-ATPase-rich cells in the gills of an elasmobranch by immunohistochemistry.

## Materials and methods

### *Animal collection and holding conditions*

Ten Atlantic stingrays *Dasyatis sabina* were captured from the St Johns River, FL, USA (Lake Jesup or Lake George), as described by Piermarini and Evans (1998). Animals were held in two 3791 freshwater, closed-system tanks (five stingrays per tank; <1 ‰ salinity). In addition, five marine Atlantic stingrays were captured *via* hook and line from Cedar Key, FL, USA, transported to Gainesville, FL, USA, and held in a 3791 seawater, closed-system tank (30–32 ‰).

One of the freshwater groups was left in fresh water, while the other was gradually acclimated to sea water as follows. After 1 week in fresh water, the salinity was raised to 16 ‰ over 2 days (8 ‰ per day). After 2 days in 16 ‰, the salinity was raised to 32 ‰ over 3 days. The animals remained at a salinity of 32 ‰ for 1 week before tissue samples were taken. The marine stingrays remained in sea water (32 ‰) for the entire period. All the animals were fed live grass shrimp (*Palaemonetes* sp.) every other day and were starved for 48 h prior to tissue collection.

The water temperature of all the tanks was 25 °C, and pH was maintained at 8.2 using freshwater and marine buffers (Seachem). The tanks were also equipped with biological filtration to keep NH<sub>3</sub> and NO<sub>3</sub> levels below 1 p.p.m.

*Collection of tissues*

Animals were anesthetized in 41 of a 0.01% MS-222 solution made with tank water. For freshwater stingrays, the solution was buffered with a commercial freshwater pH buffer (Seachem) to prevent acidification by the MS-222. Once anesthetized, animals were placed ventral side up in a slanted water bath with the gills immersed in the anesthetic.

To clear the gills and rectal gland of red blood cells, the animal was perfused with elasmobranch Ringer's solution (Forster et al., 1972) at 4 °C. For freshwater stingrays, the Ringer's solution was modified by reducing the NaCl concentration to 200 mmol l<sup>-1</sup>, the urea concentration to 200 mmol l<sup>-1</sup> and the trimethylamine oxide concentration to 41 mmol l<sup>-1</sup>. The skin ventral to the heart and pericardium was removed, and 0.5–1.0 ml of blood was removed from the ventricle with a heparinized 25 gauge needle attached to a 1 ml syringe. An equal volume of heparinized Ringer's solution was then injected into the ventricle and allowed to circulate for a few minutes. A cannula, connected to a perfusion bottle (positioned 1 m above the animal), was inserted into the conus arteriosus and held by forceps. Once the perfusion had started, the sinus venosus was cut to relieve back pressure. The perfusion was continued until the gills appeared bleached and the fluid exiting the pericardial cavity was clear of blood (usually 3–5 min).

Immediately after the perfusion, the animal was pithed, and the second left and right gill arches were removed and placed in an elasmobranch Ringer's solution on ice. Gill filaments were trimmed off the arches and placed in fixative (3% paraformaldehyde, 0.05% glutaraldehyde, 0.05% picric acid in 10 mmol l<sup>-1</sup> phosphate-buffered saline, pH 7.3) for 24 h at 4 °C. Additional filaments were snap-frozen in liquid nitrogen for western blot analysis or placed in ice-cold SEI buffer (250 mol l<sup>-1</sup> sucrose, 10 mmol Na<sub>2</sub>EDTA, 50 mol l<sup>-1</sup> imidazole, pH 7.3), which was then frozen on dry ice for Na<sup>+</sup>/K<sup>+</sup>-ATPase activity measurements. The rectal gland was then excised, and pieces were taken for western blot and Na<sup>+</sup>/K<sup>+</sup>-ATPase activity measurements. All samples for western blots and enzyme assays were stored at –80 °C.

*Na<sup>+</sup>/K<sup>+</sup>-ATPase activity*

Na<sup>+</sup>/K<sup>+</sup>-ATPase activity was measured using the technique developed by McCormick (1993). In brief, the tissue frozen in SEI buffer was rapidly thawed and homogenized, and the homogenate was centrifuged at 5000 g for 30 s at 4 °C. The supernatant (10 µl) was added to four wells of a 96-well microplate on ice, and an assay mixture (200 µl) with or without ouabain (0.5 mmol l<sup>-1</sup>) was then added. The composition of the assay mixture was identical to that described by McCormick (1993), except that the concentrations of Na<sup>+</sup>, K<sup>+</sup> and Mg<sup>2+</sup> were 45, 5 and 10 mmol l<sup>-1</sup>, respectively. These concentrations were optimized for Atlantic stingray tissue and were similar to those used by Morgan et al. (1997) for spiny dogfish gill and rectal gland tissue. Na<sup>+</sup>/K<sup>+</sup>-ATPase activity was determined by subtracting the oxidation rate of NADH to NAD (at 340 nm)

in the presence of ouabain from the rate in the absence of ouabain at 25 °C. Absorbance was measured using a Spectramax 250 microplate reader (Molecular Devices). Total protein was measured using a bicinchoninic acid assay (Pierce). Activity was expressed as µmol ADP h<sup>-1</sup> mg<sup>-1</sup> protein.

*Western blots*

Preparation of tissue for western blots was modified from Claiborne et al. (1999). On a single day, gill filaments or a piece of rectal gland from one animal in each experimental condition were prepared for western blotting. The tissue was placed in ice-cold homogenization buffer [250 mmol l<sup>-1</sup> sucrose, 1 mmol l<sup>-1</sup> Na<sub>2</sub>EDTA, 2 µg ml<sup>-1</sup> aprotinin, 2 µg ml<sup>-1</sup> leupeptin, 100 µg ml<sup>-1</sup> phenyl methylsulfonyl fluoride (PMSF) and 30 mmol l<sup>-1</sup> Tris] and homogenized on ice using a 'Tissue-tearor' in a cold room at 4 °C. Homogenates were filtered through cheesecloth and centrifuged (3000 g) for 5 min at 4 °C to remove nuclei and debris. The supernatant was then filtered through cheesecloth and centrifuged (50 000 g) for 30 min at 4 °C to pellet membrane fractions. The pellet was resuspended with a minimal volume of ice-cold homogenization buffer, and an equal volume of a modified Laemmli sample buffer (Laemmli, 1970), without Bromophenol Blue and β-mercaptoethanol, was then added to solubilize the proteins.

The resulting protein samples were centrifuged for 5–10 s at 16 000 g to pellet any undissolved material. The total protein content of the supernatant was determined using a detergent-compatible assay (Bio-Rad), after which Bromophenol Blue was added to a final concentration of 0.01% and β-mercaptoethanol to a final concentration of 2%.

A 20 µg sample of total protein for gill (5 µg for rectal gland) was loaded in triplicate and run on a 7.5% Tris-HCl precast polyacrylamide gel (Bio-Rad) for 1 h at 125 V. Note that it was necessary to load four times more total protein in gill samples because of the lower α-subunit abundance per microgram of total protein compared with the rectal gland. Proteins were then transferred to a polyvinylidene difluoride (PVDF; Bio-Rad) membrane using a wet (20% methanol, Tris-glycine) transfer unit for 2.5 h at 90 V in a cold room at 4 °C with stirring.

The PVDF was blocked with Blotto for 1.5 h at 25 °C and then transferred to the primary antibody solution (monoclonal antibody 'a5' culture supernatant diluted 1:1000 in Blotto) overnight at 4 °C. The primary antibody, 'a5', developed by Dr Douglas Fambrough, was obtained from the Developmental Studies Hybridoma Bank developed under the auspices of the National Institute of Child Health and Human Development and maintained by The University of Iowa, Department of Biological Sciences, Iowa City, IA 52242, USA. This antibody was raised against the α-subunit of avian Na<sup>+</sup>/K<sup>+</sup>-ATPase and is not isoform-specific. It has been used numerous times to study Na<sup>+</sup>/K<sup>+</sup>-ATPase in fish gills (see Witters et al., 1996; Choe et al., 1999; Schreiber and Specker, 1999; Dang et al., 2000).

After primary antibody incubation, the PVDF was washed three times (15 min each) with Tris-buffered saline with 1%

Tween-20 (TTBS), then incubated with an alkaline-phosphatase-conjugated goat anti-mouse IgG secondary antibody (Bio-Rad; diluted 1:3000 in Blotto) for 2 h at 25 °C. The PVDF was then washed three times (15 min each) with TTBS, and a substrate solution (Bio-Rad Immun-Star ECL Kit) was applied to the PVDF for 5 min at 25 °C to initiate a luminescent signal. Binding of antibody was detected by exposing Hyperfilm-ECL imaging film (Amersham) to the PVDF membrane. The film was developed according to the manufacturer's protocol. The film was exposed for a series of times (0, 15, 30, 45, 60, 75, 90 s) to ensure linearity of the signal. Negatives were digitized into TIFF files, using a UMAX flatbed scanner with transparency adapter, and analyzed using NIH Image version 1.61 (National Institutes of Health, USA).

To quantify the relative abundance of the  $\alpha$ -subunit, we measured the intensity of the immunopositive bands using densitometry and standardized all measurements to the freshwater condition. Therefore, intensity measurements of freshwater individuals for a particular tissue were 1.0.

#### Immunohistochemistry

Fixed tissue was stored in two changes of 75 % ethanol at 25 °C, dehydrated in an ethanol series, and embedded in paraffin wax within 2 weeks of fixation. Serial sections of gill tissue, parallel to the long axis of the filament, were cut at 6  $\mu$ m and placed on poly-L-lysine-coated slides. For immunostaining, only slides containing sections from the trailing half of the gill lamellae and filament were chosen. In preliminary trials, we found that  $\text{Na}^+/\text{K}^+$ -ATPase-rich cells were located exclusively on the trailing half of gill lamellae and filaments (P. M. Piermarini and D. H. Evans, unpublished observation), similar to the observations reported for teleost chloride cells (see Van Der Heijden et al., 1997). The sections were deparaffinized in Hemo-De, hydrated in an ethanol series, and washed in 10 mol l<sup>-1</sup> phosphate-buffered saline (PBS). A hydrophobic PAP-Pen (Electron Microscopy Suppliers) was used to draw circles around the tissue sections, and 3 % H<sub>2</sub>O<sub>2</sub> was then placed on the sections for 25 min to inhibit endogenous peroxidase activity. Sections were also blocked with a casein solution (Powerblock, Biogenex) for 5 min before application of the primary antibody.

The primary antibody, monoclonal antibody 'a5' (diluted 1:175 in PBS), was placed on the sections for 2 h at 25 °C. The antibody was rinsed off, and the sections were washed in PBS for 5 min. After application of the primary antibody, the sections were incubated with a biotinylated anti-mouse IgG secondary antibody (Biogenex) and a horseradish-peroxidase-labeled streptavidin solution (Biogenex) for 20 min each at 25 °C. After washing with PBS for 5 min, antibody binding was visualized by applying a solution of 3,3'-diaminobenzidine tetrahydrochloride (DAB; Biogenex) to the sections for 5 min at 25 °C. No staining was detected when non-immune mouse serum was used instead of primary antibody.

Quantification of the immunohistochemistry was performed by counting the number of immunopositive ( $\text{Na}^+/\text{K}^+$ -ATPase-rich) cells per gill lamella and per interlamellar space. For each

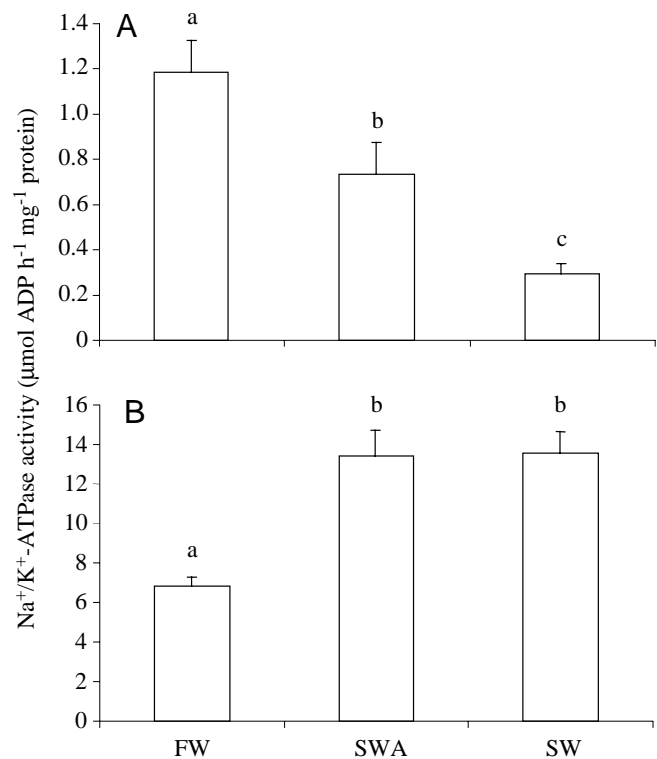

Fig. 1.  $\text{Na}^+/\text{K}^+$ -ATPase activity in the gills (A) and rectal gland (B) of Atlantic stingrays.  $N=5$  for all groups, except seawater-acclimated (SWA) and seawater (SW) rectal gland, for which  $N=4$ . Values are means + 1 S.E.M. Lower case letters indicate statistical categorization of the means, as determined by a Student–Newman–Keuls *post-hoc* test ( $P<0.05$ ). FW, freshwater stingrays.

animal, three immunostained slides were chosen at random. On a section from each slide, the number of  $\text{Na}^+/\text{K}^+$ -ATPase-rich cells was counted on 30 randomly selected lamellae and interlamellar regions. The length of the lamella was also measured to standardize cell counts on the lamellae. Results are expressed as the number of cells per lamella and the number of cells per interlamellar region.

#### Statistical analyses

For mean  $\text{Na}^+/\text{K}^+$ -ATPase activities and the number of  $\text{Na}^+/\text{K}^+$ -ATPase-rich cells, differences among groups were detected using a one-way analysis of variance (ANOVA), with a Student–Newman–Keuls *post-hoc* test. Differences in relative band intensities from western blots were detected using a Kruskal–Wallis non-parametric ANOVA, with a Kruskal–Wallis *post-hoc* test (Conover, 1980). All tests were two-tailed, and differences were considered significant if  $P<0.05$ .

## Results

#### $\text{Na}^+/\text{K}^+$ -ATPase activity

$\text{Na}^+/\text{K}^+$ -ATPase activity was measured in the gills and rectal gland of stingrays to compare the overall catalytic activity of the enzyme in the different groups. In gills,  $\text{Na}^+/\text{K}^+$ -ATPase activity was highest in freshwater, intermediate in seawater-acclimated



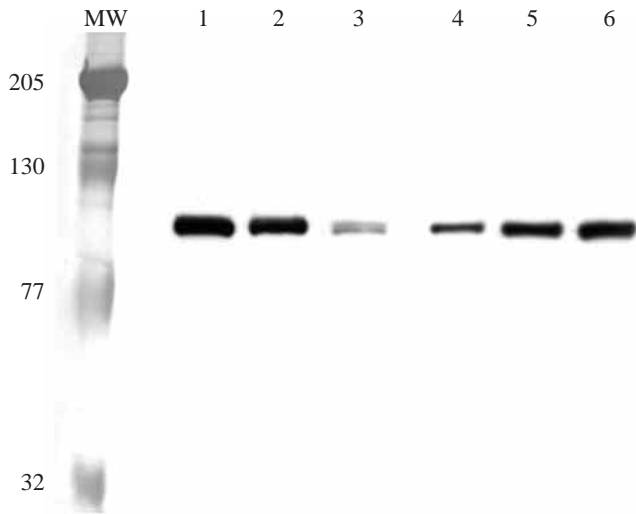

Fig. 2. Representative western blot of gill and rectal gland tissue from Atlantic stingrays. Antibody was specific for a  $110.9 \pm 1.0$  kDa protein in gills and a  $111.7 \pm 1.4$  kDa protein in the rectal gland (means  $\pm$  S.E.M.,  $N=5$ ), representing the  $\alpha$ -subunit of  $\text{Na}^+/\text{K}^+$ -ATPase. MW, molecular mass marker (kDa). Lanes 1, 2, 3, gill tissue from freshwater, seawater-acclimated and seawater stingrays ( $20 \mu\text{g}$  total protein per lane), respectively. Lanes 4, 5, 6, rectal gland tissue from freshwater, seawater-acclimated and seawater stingrays ( $5 \mu\text{g}$  total protein per lane), respectively. Note the decrease in band intensity from freshwater to seawater in gills and increase in band intensity from freshwater to seawater in rectal gland. The intensity of gill and rectal gland bands cannot be compared since different amounts of total protein were loaded.

and lowest in seawater stingrays (Fig. 1A). In contrast, rectal gland  $\text{Na}^+/\text{K}^+$ -ATPase activity was lowest in freshwater stingrays and higher in seawater-acclimated and seawater stingrays, in which levels were equivalent (Fig. 1B). If rectal gland mass is taken into account, the total  $\text{Na}^+/\text{K}^+$ -ATPase activity (rectal gland mass  $\times$   $\text{Na}^+/\text{K}^+$ -ATPase activity) would be lowest in freshwater stingrays, intermediate in seawater-acclimated stingrays and highest in seawater stingrays.

*Western blots*

We used western blotting to determine whether the differences in  $\text{Na}^+/\text{K}^+$ -ATPase activity were correlated with changes in the relative abundance of the enzyme. Antibody ‘a5’ was highly cross-reactive for a band with a molecular mass of  $110.9 \pm 1.0$  kDa in gills and  $111.7 \pm 1.4$  kDa (means  $\pm$  S.E.M.,  $N=5$ ) in rectal glands (Fig. 2), which is within the expected molecular mass range for the  $\alpha$ -subunit (Blanco and Mercer, 1998). In the gills, the relative abundance of the  $\alpha$ -subunit followed a similar trend to the  $\text{Na}^+/\text{K}^+$ -ATPase activities:  $\alpha$ -subunit abundance was highest in freshwater, intermediate in seawater-acclimated and lowest in seawater stingrays (Fig. 3A). In the rectal gland, the relative abundance of the  $\alpha$ -subunit also followed a similar trend to the  $\text{Na}^+/\text{K}^+$ -ATPase activities;  $\alpha$ -subunit abundance was lowest in freshwater and higher in seawater-acclimated and seawater stingrays (Fig. 3B).

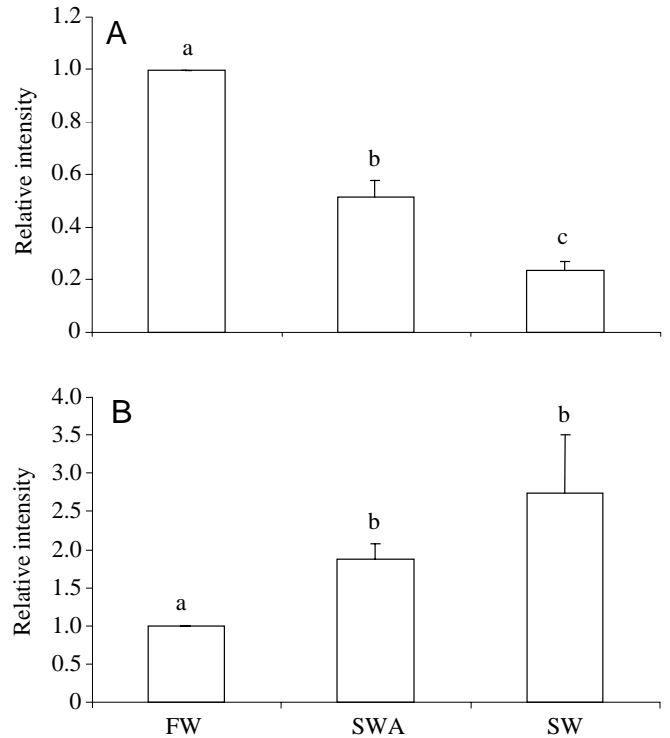

Fig. 3. Relative intensity of immunopositive bands representing the  $\alpha$ -subunit of  $\text{Na}^+/\text{K}^+$ -ATPase in the gills (A) and rectal gland (B) of Atlantic stingrays.  $N=5$  for all groups. Although statistical differences were detected with a non-parametric test (Kruskal–Wallis ANOVA), values are presented as means  $\pm$  1 S.E.M. for clarity. Lower case letters indicate statistical categorization of groups as determined by a Kruskal–Wallis *post-hoc* test ( $P<0.05$ ). FW, freshwater stingrays; SW, seawater stingrays; SWA, seawater-acclimated stingrays.

*Immunohistochemistry*

Changes in the distribution of gill  $\text{Na}^+/\text{K}^+$ -ATPase-rich cells associated with salinity were visualized using immunolocalization of the  $\alpha$ -subunit on fixed tissue sections (Fig. 4). Staining for  $\text{Na}^+/\text{K}^+$ -ATPase was restricted to relatively large cells (presumably mitochondria-rich cells) and was not found on respiratory pavement cells (Fig. 4). The number of  $\text{Na}^+/\text{K}^+$ -ATPase-rich cells per lamella and the sum of the number of  $\text{Na}^+/\text{K}^+$ -ATPase-rich cells per lamella plus the number of  $\text{Na}^+/\text{K}^+$ -ATPase-rich cells per interlamellar region followed the same trend as  $\text{Na}^+/\text{K}^+$ -ATPase activity and relative abundance; freshwater stingrays had the most, seawater-acclimated stingrays had intermediate amounts and seawater stingrays had the fewest (Fig. 5A,C). In the interlamellar region, seawater-acclimated gills had the most  $\text{Na}^+/\text{K}^+$ -ATPase-rich cells, followed by freshwater and then seawater gills (Fig. 5B).

Although the intensity of the immunostaining was not quantified, there appeared to be qualitative trends. In freshwater stingrays, staining was darkest in  $\text{Na}^+/\text{K}^+$ -ATPase-rich cells on the ends of the lamellae; the staining appeared to weaken towards the interlamellar region and was weakest in cells from

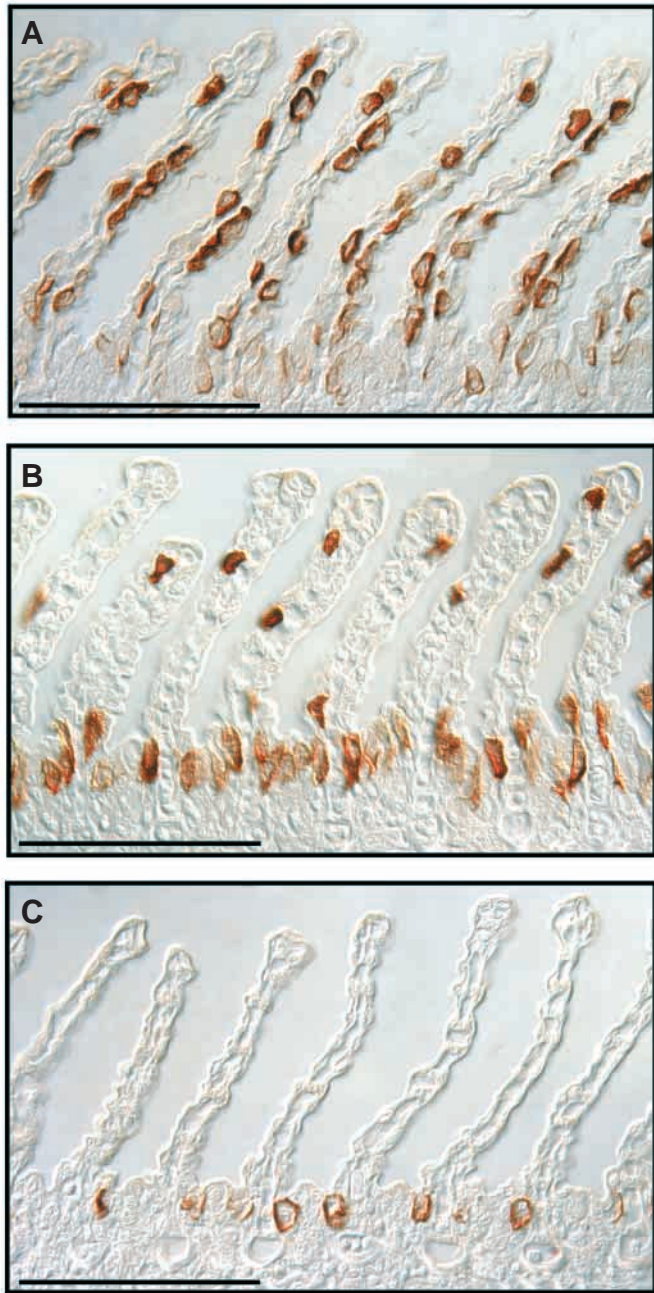

Fig. 4. Representative immunostaining for  $\text{Na}^+/\text{K}^+$ -ATPase-rich cells in longitudinal sections of gill filaments from freshwater (A), seawater-acclimated (B) and seawater (C) Atlantic stingrays. Scale bars,  $100\ \mu\text{m}$ .  $\text{Na}^+/\text{K}^+$ -ATPase-rich cells occurred on lamellae (finger-like projections) and/or interlamellar regions (basal to and between lamellae). Note the differences in  $\text{Na}^+/\text{K}^+$ -ATPase-rich cell location (lamella *versus* interlamellar region) and darkness of staining within and between groups.

the interlamellar region (Fig. 4A). In seawater-acclimated stingrays,  $\text{Na}^+/\text{K}^+$ -ATPase-rich cells stained heavily on both the lamellae and interlamellar region (Fig. 4B). In seawater stingrays, the  $\text{Na}^+/\text{K}^+$ -ATPase-rich cells were moderately stained in the interlamellar region (Fig. 4C).

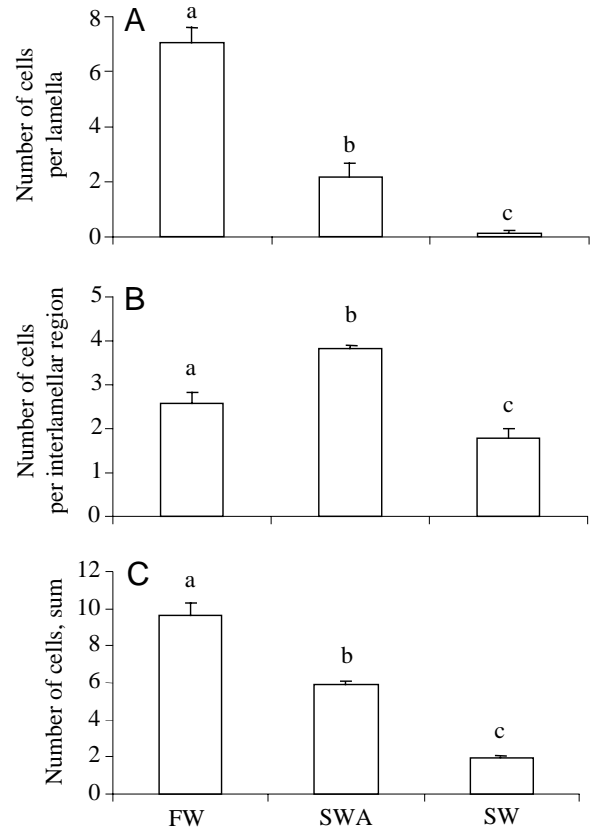

Fig. 5.  $\text{Na}^+/\text{K}^+$ -ATPase-rich cell numbers in the gills of freshwater (FW), seawater-acclimated (SWA) and seawater (SW) Atlantic stingrays. (A) Number of  $\text{Na}^+/\text{K}^+$ -ATPase-rich cells per lamella; (B) number of  $\text{Na}^+/\text{K}^+$ -ATPase-rich cells per interlamellar region; (C) 'sum' number of  $\text{Na}^+/\text{K}^+$ -ATPase-rich cells (per lamella plus per interlamellar region). Values are means  $\pm$  1 S.E.M. Lower case letters indicate statistical categorization of the means as determined by a Student–Newman–Keuls *post-hoc* test ( $P < 0.05$ ).

## Discussion

### Gills

The results from this study suggest that  $\text{Na}^+/\text{K}^+$ -ATPase activity associated with the gills of the Atlantic stingray is negatively correlated with salinity. Branchial  $\text{Na}^+/\text{K}^+$ -ATPase activity was highest in freshwater stingrays, followed by seawater-acclimated and, lastly, seawater animals. In salmonids and anguillids, gill  $\text{Na}^+/\text{K}^+$ -ATPase activity is positively correlated with environmental salinity, but a negative or no correlation with salinity has been found in other fishes (McCormick, 1995; Jensen et al., 1998; Kelly et al., 1999; Marshall et al., 1999). Differences in stingray gill  $\text{Na}^+/\text{K}^+$ -ATPase activity were positively correlated with changes in the relative abundance of the  $\alpha$ -subunit and in the numbers of  $\text{Na}^+/\text{K}^+$ -ATPase-rich cells. This suggests that salinity-induced changes in branchial  $\text{Na}^+/\text{K}^+$ -ATPase activity in the Atlantic stingray are accomplished by regulating the relative amounts of  $\text{Na}^+/\text{K}^+$ -ATPase protein, probably through the number of  $\text{Na}^+/\text{K}^+$ -ATPase-rich cells on gill lamellae. If elasmobranch gill  $\text{Na}^+/\text{K}^+$ -ATPase is regulated like that of

teleosts, then the decrease in Na<sup>+</sup>/K<sup>+</sup>-ATPase  $\alpha$ -subunit protein abundance found in seawater-acclimated and seawater stingrays may be a result of a decrease in  $\alpha$ -subunit mRNA levels (Cutler et al., 1995; Madsen et al., 1995; Hwang et al., 1998; Jensen et al., 1998; D'Cotta et al., 2000) brought about by a decrease in transcription or an increase in mRNA degradation. In salmonids, the turnover rate of gill Na<sup>+</sup>/K<sup>+</sup>-ATPase protein does not appear to be affected by salinity (D'Cotta et al., 2000).

Na<sup>+</sup>/K<sup>+</sup>-ATPase activity from the gills of a freshwater elasmobranch has not previously been measured. The increased branchial Na<sup>+</sup>/K<sup>+</sup>-ATPase activity associated with freshwater stingrays may indicate that the gills have an active transport role in fresh water, possibly for ion uptake. An alternative explanation is that the increase in Na<sup>+</sup>/K<sup>+</sup>-ATPase activity is associated with an increased cost of cell volume regulation in freshwater gill cells, but this explanation is unlikely since the immunostaining occurred in specific cell types and not across the entire gill epithelium (see Fig. 4). The levels of branchial Na<sup>+</sup>/K<sup>+</sup>-ATPase activity in the seawater-acclimated and seawater stingrays were lower than those in the freshwater stingrays. This was expected since elasmobranchs have a salt-secreting rectal gland that is the primary site of NaCl excretion (Shuttleworth, 1988). Although the branchial Na<sup>+</sup>/K<sup>+</sup>-ATPase activity is comparatively low, it may be enough to drive some active NaCl excretion, especially in cases where the rectal gland is removed (see Evans et al., 1982) or reduced in size (see below).

Since Na<sup>+</sup>/K<sup>+</sup>-ATPase-rich cells were most prevalent on the lamellae of the freshwater stingrays, it is probable that these cells are involved with active ion uptake. Na<sup>+</sup>/K<sup>+</sup>-ATPase-rich, or chloride, cells have been reported on the gill lamellae of several freshwater-acclimated teleost species (Avella et al., 1987; Uchida et al., 1996; Ura et al., 1996; Seidelin and Madsen, 1999; Wong and Chan, 1999) where it has been proposed that they are involved in ion uptake from a freshwater environment (Laurent and Dunel, 1980; Avella et al., 1987; Uchida et al., 1996). The processes of ion uptake and acid–base balance are, however, inextricably linked in the gills of freshwater fish (see Claiborne, 1998; Evans et al., 1999), so the Na<sup>+</sup>/K<sup>+</sup>-ATPase-rich cells may also be involved with the excretion of acid (H<sup>+</sup>) and/or base (HCO<sub>3</sub><sup>-</sup>).

Since there was an increase in the number and/or staining intensity of Na<sup>+</sup>/K<sup>+</sup>-ATPase-rich cells found on the gill filaments of seawater-acclimated and seawater stingrays, it is possible that these cells are involved in active NaCl excretion, a function that has been suggested for the Na<sup>+</sup>/K<sup>+</sup>-ATPase-rich cells found in the interlamellar regions of the gills of seawater-acclimated teleosts (see Uchida et al., 1996). However, the presence of Na<sup>+</sup>/K<sup>+</sup>-ATPase-rich cells in the gills does not necessarily imply active NaCl excretion. Hagfish (*Myxine glutinosa*) also possess branchial Na<sup>+</sup>/K<sup>+</sup>-ATPase-rich cells (Choe et al., 1999), but are strict ion conformers. Choe et al. (1999) suggested that hagfish Na<sup>+</sup>/K<sup>+</sup>-ATPase-rich cells may facilitate acid–base exchange (see Evans, 1984) and/or Ca<sup>2+</sup> transport (see Forster and Fenwick, 1994), which is known to

occur across the hagfish gill epithelium. These functions should also be considered for the Na<sup>+</sup>/K<sup>+</sup>-ATPase-rich cells found in the gills of seawater-acclimated and seawater stingrays.

#### Rectal gland

Na<sup>+</sup>/K<sup>+</sup>-ATPase activity in rectal glands from seawater-acclimated and seawater stingrays was greater than that from freshwater stingrays. Differences in rectal gland Na<sup>+</sup>/K<sup>+</sup>-ATPase activity were positively correlated with changes in the relative abundance of the  $\alpha$ -subunit. This suggests that the salinity-associated regulation of rectal gland Na<sup>+</sup>/K<sup>+</sup>-ATPase activity in the Atlantic stingray is due to changes in the relative amounts of Na<sup>+</sup>/K<sup>+</sup>-ATPase protein present.

The measurements of freshwater stingray rectal gland Na<sup>+</sup>/K<sup>+</sup>-ATPase activity presented in this study are the first to be reported for a freshwater elasmobranch. Even though the freshwater rectal gland Na<sup>+</sup>/K<sup>+</sup>-ATPase activity was approximately 50% lower than that of seawater-acclimated and seawater stingrays, the freshwater activity is still approximately seven times higher than that found in the gills. It is possible that the rectal glands of freshwater stingrays cannot completely inhibit active NaCl secretion, an indication of their relatively recent (in evolutionary time) occurrence in fresh water. Also, maintaining a relatively high Na<sup>+</sup>/K<sup>+</sup>-ATPase activity in lower salinities would probably be adaptive for a species that frequently encounters variations in environmental salinity (see Marshall et al., 1999). An alternative explanation is that some of the Na<sup>+</sup>/K<sup>+</sup>-ATPase activity in the freshwater rectal gland may be related to a secondary function, such as the active excretion of xenobiotics that has recently been described in the rectal gland of *Squalus acanthias* (Miller et al., 1998). Further biochemical studies on the rectal gland of the freshwater stingray should help elucidate its function.

Since the primary role of the elasmobranch rectal gland is to actively secrete NaCl, it was not surprising that we found an increased Na<sup>+</sup>/K<sup>+</sup>-ATPase activity in seawater-acclimated and seawater stingrays. However, it is important to note that the size of this gland does not change appreciably in the seawater-acclimated stingrays, and it is still approximately 50–70% smaller than a seawater stingray rectal gland (Piermarini and Evans, 1998). The total rectal gland Na<sup>+</sup>/K<sup>+</sup>-ATPase activity (rectal gland mass  $\times$  Na<sup>+</sup>/K<sup>+</sup>-ATPase activity) in seawater-acclimated animals is therefore probably less than in the seawater stingrays, even though it may be similar on a 'per microgram protein' level. This suggests a lower overall salt secretory potential in the rectal glands of seawater-acclimated compared with seawater animals. If rectal glands from seawater-acclimated stingrays have a lower salt secretory potential than those from seawater individuals, it is possible that seawater-acclimated stingrays have extra-rectal-gland mechanisms of NaCl excretion. A potential site for this NaCl excretion would be the Na<sup>+</sup>/K<sup>+</sup>-ATPase-rich cells in the interlamellar region of the gill whose numbers and intensity were enhanced during acclimation to sea water (see Fig. 5B).



An alternative explanation is that seawater-acclimated stingrays may compensate for the reduced rectal gland mass by increasing the secretion rate and/or NaCl concentration of the secreted rectal gland fluid. In addition, the relative abundance of the cystic-fibrosis transmembrane regulator (CFTR) chloride channel, which is thought to be the rate-limiting step in active NaCl excretion by the rectal gland (Riordan et al., 1994), may increase. Further studies on other transporters involved with active NaCl excretion in the rectal gland (i.e. CFTR, Na<sup>+</sup>/K<sup>+</sup>/2Cl<sup>-</sup> cotransporter, K<sup>+</sup> channel) as well as functional studies on isolated, perfused glands would be helpful in comparing the relative salt-secreting capabilities of the rectal glands of seawater-acclimated and seawater stingrays.

In conclusion, we have presented data for different patterns of Na<sup>+</sup>/K<sup>+</sup>-ATPase expression associated with environmental salinity in the gills and rectal gland of a euryhaline elasmobranch. The activity and abundance of Na<sup>+</sup>/K<sup>+</sup>-ATPase in the gills were negatively correlated with salinity, which suggests that the gills are important for active ion uptake from low-salinity environments. In contrast, Na<sup>+</sup>/K<sup>+</sup>-ATPase activity and abundance in the rectal gland were positively correlated with salinity, which supports earlier findings that the rectal gland is the primary site of NaCl excretion in marine elasmobranchs. The evolution of the euryhaline lifestyle found in the Atlantic stingray is probably linked to this plasticity of Na<sup>+</sup>/K<sup>+</sup>-ATPase expression found in the gills and rectal gland. It would be interesting to study closely related species with a more restricted salinity tolerance (i.e. *Dasyatis say*, *Dasyatis americana*, *Potamotrygon* sp.) to determine whether their ability to express Na<sup>+</sup>/K<sup>+</sup>-ATPase differentially is more limited. In addition, studies on other important ion regulatory transporters (i.e. H<sup>+</sup>-ATPase, Na<sup>+</sup>/K<sup>+</sup>/2Cl<sup>-</sup> cotransporter, CFTR) would be useful to examine the rare phenomenon of elasmobranch euryhalinity on a biochemical and cellular level.

We would like to thank the following people and organizations for their input and/or assistance with this study: Elena Amesbury, Craig Aubrey, Dr Lauren Chapman, Keith Choe, Dr Linda Green, Dr Louis Guillette Jr, Dr Karl Karnaky Jr, Dr Steve McCormick, Dr Frank Nordlie, Dr Buck Snelson, Dr Colette St. Mary, Dr Jill Verlander-Reed, University of Florida Zoology Department, University of Florida Seahorse Key Marine Laboratory and the Electron Microscopy Core Laboratory, Biotechnology Program, University of Florida. This work was supported by an EPA-STAR Graduate Research Fellowship U-915419-01-0 (P.M.P.), an American Elasmobranch Society Student Research Award (P.M.P.), an Explorer's Club Exploration Fund (P.M.P.) and NSF Grant IBN-9604824 (D.H.E.).

#### References

- Avella, M., Masoni, A., Bornancin, M. and Mayer, G. N. (1987). Gill morphology and sodium influx in the rainbow trout (*Salmo gairdneri*) acclimated to artificial freshwater environments. *J. Exp. Zool.* **241**, 159–170.
- Blanco, G. and Mercer, R. W. (1998). Isozymes of the Na–K–ATPase: Heterogeneity in structure, diversity in function. *Am. J. Physiol.* **275**, F633–F650.
- Burger, J. W. (1965). Roles of the rectal gland and kidneys in salt and water excretion in the spiny dogfish. *Physiol. Zool.* **38**, 191–196.
- Choe, K. P., Edwards, S., Morrison-Shetlar, A. I., Toop, T. and Claiborne, J. B. (1999). Immunolocalization of Na<sup>+</sup>/K<sup>+</sup>-ATPase in mitochondrion-rich cells of the Atlantic hagfish (*Myxine glutinosa*) gill. *Comp. Biochem. Physiol.* **124A**, 161–168.
- Claiborne, J. B. (1998). Acid–base regulation. In *The Physiology of Fishes* (ed. D. H. Evans), pp. 177–198. Boca Raton, FL: CRC Press.
- Claiborne, J. B., Blackston, C. R., Choe, K. P., Dawson, D. C., Harris, S. P., MacKenzie, L. A. and Morrison, S. A. I. (1999). A mechanism for branchial acid excretion in marine fish: identification of multiple Na<sup>+</sup>/H<sup>+</sup> antiporter (NHE) isoforms in gills of two seawater teleosts. *J. Exp. Biol.* **202**, 315–324.
- Conley, D. M. and Mallatt, J. (1988). Histochemical localization of Na<sup>+</sup>–K<sup>+</sup> ATPase and carbonic anhydrase activity in gills of 17 fish species. *Can. J. Zool.* **66**, 2398–2405.
- Conover, W. J. (1980). *Practical Nonparametric Statistics*. New York: John Wiley & Sons.
- Crockett, E. L. (1999). Lipid restructuring does not contribute to elevated activities of Na<sup>+</sup>/K<sup>+</sup>-ATPase in basolateral membranes from the gill of seawater-acclimated eel (*Anguilla rostrata*). *J. Exp. Biol.* **202**, 2385–2392.
- Cutler, C. P., Sanders, I. L., Hazon, N. and Cramb, G. (1995). Primary sequence, tissue specificity and expression of the Na<sup>+</sup>,K<sup>+</sup>-ATPase alpha-1 subunit in the European eel (*Anguilla anguilla*). *Comp. Biochem. Physiol.* **111B**, 567–573.
- Dang, Z., Lock, R. A. C., Flik, G. and Wendelaar Bonga, S. E. (2000). Na<sup>+</sup>/K<sup>+</sup>-ATPase immunoreactivity in branchial chloride cells of *Oreochromis mossambicus* exposed to copper. *J. Exp. Biol.* **203**, 379–387.
- D'Cotta, H., Valotaire, C., Le Gac, F. and Prunet, P. (2000). Synthesis of gill Na<sup>+</sup>–K<sup>+</sup>-ATPase in Atlantic salmon smolts: differences in α-mRNA and α-protein levels. *Am. J. Physiol.* **278**, R101–R110.
- Donald, J. A., Toop, T. and Evans, D. H. (1997). Distribution and characterization of natriuretic peptide receptors in the gills of the spiny dogfish, *Squalus acanthias*. *Gen. Comp. Endocr.* **106**, 338–347.
- Evans, D. H. (1984). Gill Na<sup>+</sup>/H<sup>+</sup> and Cl<sup>-</sup>/HCO<sub>3</sub><sup>-</sup> exchange systems evolved before the vertebrates entered fresh water. *J. Exp. Biol.* **113**, 465–469.
- Evans, D. H., Oikari, A., Kormanik, G. A. and Mansberger, L. (1982). Osmoregulation by the prenatal spiny dogfish *Squalus acanthias*. *J. Exp. Biol.* **101**, 295–305.
- Evans, D. H., Piermarini, P. M. and Potts, W. T. W. (1999). Ionic transport in the fish gill epithelium. *J. Exp. Zool.* **283**, 641–652.
- Eveloff, J., Karnaky, K. J., Jr, Silva, P., Epstein, F. H. and Kinter, W. B. (1979). Elasmobranch rectal gland cell: Autoradiographic localization of tritium-labeled ouabain-sensitive (sodium, potassium)-ATPase in rectal gland of dogfish, *Squalus acanthias*. *J. Cell Biol.* **83**, 16–32.
- Ewart, H. S. and Klip, A. (1995). Hormonal regulation of the Na<sup>+</sup>–K<sup>+</sup>-ATPase: Mechanisms underlying rapid and sustained changes in pump activity. *Am. J. Physiol.* **269**, C295–C311.
- Forster, M. E. and Fenwick, J. C. (1994). Stimulation of calcium



- efflux from the hagfish, *Eptatretus cirrhatus*, gill pouch by an extract of corpuscles of Stannius from an eel (*Anguilla dieffenbachii*): Teleostei. *Gen. Comp. Endocr.* **94**, 92–103.
- Forster, R. P., Goldstein, L. and Rosen, J. K.** (1972). Intrarenal control of urea reabsorption by renal tubules of the marine elasmobranch, *Squalus acanthias*. *Comp. Biochem. Physiol.* **42A**, 3–12.
- Gerzeli, G., De Stefano, G. F., Bolognani, L., Koenig, K. W., Gervaso, M. V. and Omodeo-Salé, M. F.** (1976). The rectal gland in relation to the osmoregulatory mechanisms of marine and freshwater elasmobranchs. In *Investigations of the Ichthyofauna of Nicaraguan Lakes* (ed. T. B. Thorson), pp. 619–627. Lincoln: School of Life Sciences, University of Nebraska.
- Hwang, P. P., Fang, M. J., Tsai, J. C., Huang, C. J. and Chen, S. T.** (1998). Expression of mRNA and protein of Na<sup>+</sup>-K<sup>+</sup>-ATPase alpha subunit in gills of tilapia (*Oreochromis mossambicus*). *Fish Physiol. Biochem.* **18**, 363–373.
- Jampol, L. M. and Epstein, F. H.** (1970). Sodium–potassium-activated adenosine triphosphatase and osmotic regulation in fishes. *Am. J. Physiol.* **218**, 607–611.
- Jensen, M. K., Madsen, S. S. and Kristiansen, K.** (1998). Osmoregulation and salinity effects on the expression and activity of Na<sup>+</sup>,K<sup>+</sup>-ATPase in the gills of European sea bass, *Dicentrarchus labrax* (L.). *J. Exp. Zool.* **282**, 290–300.
- Karnaky, K. J.** (1986). Structure and function of the chloride cell of *Fundulus heteroclitus* and other teleosts. *Am. Zool.* **26**, 209–224.
- Karnaky, K. J.** (1998). Osmotic and ionic regulation. In *The Physiology of Fishes* (ed. D. H. Evans), pp. 157–176. Boca Raton, FL: CRC Press.
- Karnaky, K. J., Jr, Kinter, L. B., Kinter, W. B. and Stirling, C. E.** (1976). Teleost chloride cell. II. Autoradiographic localization of gill Na,K-ATPase in killifish (*Fundulus heteroclitus*) adapted to low and high salinity environments. *J. Cell Biol.* **70**, 157–177.
- Kelly, S. P., Chow, I. N. K. and Woo, N. Y. S.** (1999). Haloplasticity of black seabream (*Mylio macrocephalus*): Hypersaline to freshwater acclimation. *J. Exp. Zool.* **283**, 226–241.
- Kisen, G., Gallais, C., Auperin, B., Klungland, H., Sandra, O., Prunet, P. and Andersen, O.** (1994). Northern blot analysis of the Na<sup>+</sup>,K<sup>+</sup>-ATPase alpha-subunit in salmonids. *Comp. Biochem. Physiol.* **107B**, 255–259.
- Kultz, D. and Jurss, K.** (1993). Biochemical characterization of isolated branchial mitochondria-rich cells of *Oreochromis mossambicus* acclimated to fresh water or hypersaline sea water. *J. Comp. Physiol.* **163B**, 406–412.
- Laemmli, U. K.** (1970). Cleavage of structural proteins during assembly of the head of bacteriophage T4. *Nature* **227**, 680–685.
- Laurent, P.** (1984). Gill internal morphology. In *Fish Physiology*, vol. XA (ed. W. S. Hoar and D. J. Randall), pp. 73–183. Orlando, FL: Academic Press.
- Laurent, P. and Dunel, S.** (1980). Morphology of gill epithelia in fish. *Am. J. Physiol.* **238**, R147–R159.
- Lee, T. H., Tsai, J. C., Fang, M. J., Yu, M. J. and Hwang, P. P.** (1998). Isoform expression of Na<sup>+</sup>-K<sup>+</sup>-ATPase alpha-subunit in gills of the teleost *Oreochromis mossambicus*. *Am. J. Physiol.* **275**, R926–R932.
- Madsen, S. S., Jensen, M. K., Nohr, J. and Kristiansen, K.** (1995). Expression of Na<sup>+</sup>-K<sup>+</sup>-ATPase in the brown trout, *Salmo trutta*: In vivo modulation by hormones and seawater. *Am. J. Physiol.* **269**, R1339–R1345.
- Madsen, S. S., McCormick, S. D., Young, G., Endersen, J. S., Nishioka, R. S. and Bern, H. A.** (1994). Physiology of seawater acclimation in the striped bass, *Morone saxatilis* (Walbaum). *Fish Physiol. Biochem.* **13**, 1–11.
- Marshall, W. S. and Bryson, S. E.** (1998). Transport mechanisms of seawater teleost chloride cells: An inclusive model of a multifunctional cell. *Comp. Biochem. Physiol.* **119A**, 97–106.
- Marshall, W. S., Emberley, T. R., Singer, T. D., Bryson, S. E. and McCormick, S. D.** (1999). Time course of salinity adaptation in a strongly euryhaline estuarine teleost, *Fundulus heteroclitus*: a multivariable approach. *J. Exp. Biol.* **202**, 1535–1544.
- McCormick, S. D.** (1993). Methods for nonlethal gill biopsy and measurement of Na<sup>+</sup>,K<sup>+</sup>-ATPase activity. *Can. J. Fish. Aquat. Sci.* **50**, 656–658.
- McCormick, S. D.** (1995). Hormonal control of gill Na<sup>+</sup>,K<sup>+</sup>-ATPase and chloride cell function. In *Cellular and Molecular Approaches to Fish Ionic Regulation*, vol. 14 (ed. C. M. Wood and T. J. Shuttleworth), pp. 285–315. San Diego: Academic Press.
- Miller, D. S., Masereeuw, R., Henson, J. and Karnaky, K. J., Jr** (1998). Excretory transport of xenobiotics by dogfish shark rectal gland tubules. *Am. J. Physiol.* **275**, R697–R705.
- Morgan, J. D., Wilson, J. M. and Iwama, G. K.** (1997). Oxygen consumption and Na<sup>+</sup>,K<sup>+</sup>-ATPase activity of rectal gland and gill tissue in the spiny dogfish, *Squalus acanthias*. *Can. J. Zool.* **75**, 820–825.
- Oguri, M.** (1964). Rectal glands of marine and fresh-water sharks: comparative histology. *Science* **144**, 1151–1152.
- Perry, S. F.** (1997). The chloride cell: Structure and function in the gills of freshwater fishes. *Annu. Rev. Physiol.* **59**, 325–347.
- Piermarini, P. M. and Evans, D. H.** (1998). Osmoregulation of the Atlantic stingray (*Dasyatis sabina*) from the freshwater Lake Jesup of the St. John River, Florida. *Physiol. Zool.* **71**, 553–560.
- Riordan, J. R., Forbush, B. and Hanrahan, J. W.** (1994). The molecular basis of chloride transport in shark rectal gland. *J. Exp. Biol.* **196**, 405–418.
- Sakaguchi, H. and Takei, Y.** (1998). Characterisation of C-type natriuretic peptide receptors in the gill of dogfish *Triakis scyllia*. *J. Endocr.* **156**, 127–134.
- Schreiber, A. M. and Specker, J. L.** (1999). Metamorphosis in the summer flounder *Paralichthys dentatus*: changes in gill mitochondria-rich cells. *J. Exp. Biol.* **202**, 2475–2484.
- Seidelin, M. and Madsen, S. S.** (1999). Endocrine control of Na<sup>+</sup>,K<sup>+</sup>-ATPase and chloride cell development in brown trout (*Salmo trutta*): Interaction of insulin-like growth factor-I with prolactin and growth hormone. *J. Endocr.* **162**, 127–135.
- Shikano, T. and Fujio, Y.** (1998a). Immunolocalization of Na<sup>+</sup>,K<sup>+</sup>-ATPase and morphological changes in two types of chloride cells in the gill epithelium during seawater and freshwater adaptation in a euryhaline teleost, *Poecilia reticulata*. *J. Exp. Zool.* **281**, 80–89.
- Shikano, T. and Fujio, Y.** (1998b). Immunolocalization of Na<sup>+</sup>/K<sup>+</sup>-ATPase in branchial epithelium of chum salmon fry during seawater and freshwater acclimation. *J. Exp. Biol.* **201**, 3031–3040.
- Shikano, T. and Fujio, Y.** (1998c). Relationships of salinity tolerance to immunolocalization of Na<sup>+</sup>,K<sup>+</sup>-ATPase in the gill epithelium during seawater and freshwater adaptation of the guppy, *Poecilia reticulata*. *Zool. Sci.* **15**, 35–41.
- Shikano, T. and Fujio, Y.** (1999). Changes in salinity tolerance and branchial chloride cells of newborn guppy during freshwater and seawater adaptation. *J. Exp. Zool.* **284**, 137–146.
- Shuttleworth, T. J.** (1988). Salt and water balance – Extrarenal mechanisms. In *The Physiology of the Elasmobranch Fishes* (ed. T. J. Shuttleworth), pp. 171–199. Boca Raton, FL: CRC Press.
- Silva, P., Solomon, R. J. and Epstein, F. H.** (1997). Transport

- mechanisms that mediate the secretion of chloride by the rectal gland of *Squalus acanthias*. *J. Exp. Zool.* **279**, 504–508.
- Thorson, T. B., Brooks, D. R. and Mayes, M. A.** (1983). The evolution of freshwater adaptation in stingrays. *Nat. Geogr. Res. Rep.* **15**, 663–694.
- Thorson, T. B., Wotton, R. M. and Georgi, T. A.** (1978). Rectal gland of freshwater stingrays, *Potamotrygon* spp. (Chondrichthyes: Potamotrygonidae). *Biol. Bull.* **154**, 508–516.
- Uchida, K., Kaneko, T., Yamaguchi, A., Ogasawara, T. and Hirano, T.** (1997). Reduced hypoosmoregulatory ability and alteration in gill chloride cell distribution in mature chum salmon (*Oncorhynchus keta*) migrating upstream for spawning. *Mar. Biol.* **129**, 247–253.
- Uchida, K., Kaneko, T., Yamauchi, K. and Hirano, T.** (1996). Morphometrical analysis of chloride cell activity in the gill filaments and lamellae and changes in Na<sup>+</sup>,K<sup>+</sup>-ATPase activity during seawater adaptation in chum salmon fry. *J. Exp. Zool.* **276**, 193–200.
- Ura, K., Soyano, K., Omoto, N., Adachi, S. and Yamauchi, K.** (1996). Localization of Na<sup>+</sup>,K<sup>+</sup>-ATPase in tissues of rabbit and teleosts using an antiserum directed against a partial sequence of the  $\alpha$ -subunit. *Zool. Sci.* **13**, 219–227.
- Valentich, J. D., Karnaky, K. J., Jr and Moran, W. M.** (1995). Phenotypic expression and natriuretic peptide-activated chloride secretion in cultured shark (*Squalus acanthias*) rectal gland epithelial cells. In *Cellular and Molecular Approaches to Fish Ionic Regulation*, vol. 14 (ed. C. M. Wood and T. J. Shuttleworth), pp. 285–315. San Diego, CA: Academic Press.
- Van Der Heijden, A. J. H., Verbost, P. M., Eygensteyn, J., Li, J., Bonga, S. E. W. and Flik, G.** (1997). Mitochondria-rich cells in gills of tilapia (*Oreochromis mossambicus*) adapted to fresh water or sea water: quantification by confocal laser scanning microscopy. *J. Exp. Biol.* **200**, 55–64.
- Vonck, A. P. M. A., Bonga, S. E. W. and Flik, G.** (1998). Sodium and calcium balance in Mozambique tilapia, *Oreochromis mossambicus*, raised at different salinities. *Comp. Biochem. Physiol.* **119A**, 441–449.
- Witters, H., Berckmans, P. and Vangenechten, C.** (1996). Immunolocalization of Na<sup>+</sup>,K<sup>+</sup>-ATPase in the gill epithelium of rainbow trout, *Oncorhynchus mykiss*. *Cell. Tissue Res.* **283**, 461–468.
- Wong, C. K. C. and Chan, D. K. O.** (1999). Chloride cell subtypes in the gill epithelium of Japanese eel *Anguilla japonica*. *Am. J. Physiol.* **277**, R517–R522.
- Yoshikawa, J. S. M., McCormick, S. D., Young, G. and Bern, H. A.** (1993). Effects of salinity of chloride cells and sodium,potassium-ATPase activity in the teleost *Gillichthys mirabilis*. *Comp. Biochem. Physiol.* **105A**, 311–317.
